# Supplementary material for: Impairment of chaperone-mediated autophagy leads to selective lysosomal degradation defects in the lysosomal storage disease cystinosis
Source: PubMed Central journal article supplement (PMC4328646; doi:10.15252/emmm.201404223), 2015-01-13

Figure 11C

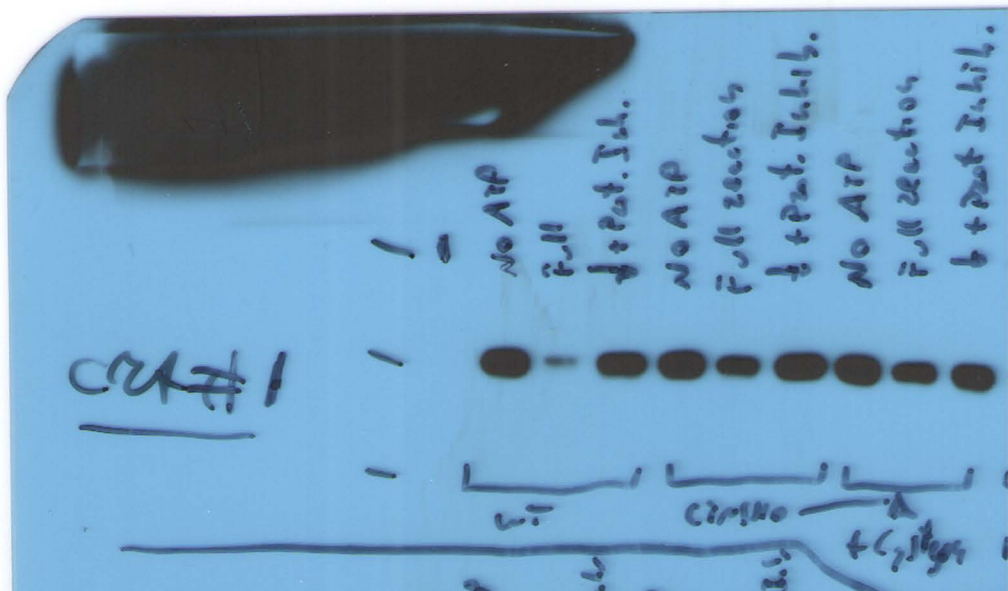

Supplement: emmm0007-0158-sd12.pdf [file emmm0007-0158-sd12.pdf]
